# Supplementary material for: A new 3D luminescent Ba-organic framework with high open metal sites: CO2 fixation, luminescence sensing, and dye sorption
Source: Royal Society of Chemistry journal article supplement (doi:10.1039/d0ce01604g), 2020-12-14
Supplement: d0ce01604g1.pdf [file d0ce01604g1.pdf]

## ***Electronic Supplementary Information (ESI)***

### **A New 3D Luminescent Ba-Organic Framework with High Open Metal Sites: CO<sub>2</sub> Fixation, Luminescent Sensing and Dye Sorption†**

Meng Wang, Jiao Liu, Jing Jin, Dan Wu, Guoping Yang\*, Wen-Yan Zhang and Yao-Yu Wang

*Key Laboratory of Synthetic and Natural Functional Molecule of the Ministry of Education, Shaanxi Key Laboratory of Physico-Inorganic Chemistry, College of Chemistry & Materials Science, Northwest University, Xi'an 710127, Shaanxi, P. R. China.*

E-mail address: \*E-mail: [ygp@nwu.edu.cn](mailto:ygp@nwu.edu.cn) (G. Yang).

## Contents

**S1.** Materials and Measurements.

**Table S1.** Selected bond lengths [Å] and angles [°] for **1**.

**Table S2.** A comparison of the luminescent MOFs and **1** used for detecting various ions.

**Fig. S1.** The coordination modes of L<sup>3-</sup> ligands in complex **1**.

**Fig. S2.** (a) The distorted dodecahedron of Ba1 and Ba2; (b) A distorted tetrakaidecahedron coordination geometry of Ba3 of complex **1**.

**Fig. S3.** (a) The helical rod SBUs metal chain viewed along the **b** axis; (b) 2D layer structure of complex **1**, the coordinated NMP are omitted for clarity.

**Fig. S4.** PXRD patterns of complex **1** and complex **1a**.

**Fig. S5.** The TGA curves for complex **1**.

**Fig. S6.** The FT-IR spectra of complex **1**.

**Fig. S7.** PXRD pattern after catalytic experiment of complex **1**.

**Fig. S8.** <sup>1</sup>H NMR spectrum of cyclic carbonate with complex **1**.

**Fig. S9.** Cyclic experiments for the cycloaddition CO<sub>2</sub> of complex **1**.

**Fig. S10.** The solid state emission spectra of free H<sub>3</sub>L ligand and complex **1**.

**Fig. S11.** The relative luminescence intensities of different concentrations Fe<sup>3+</sup> (a); Cr<sub>2</sub>O<sub>7</sub><sup>2-</sup> (b); CrO<sub>4</sub><sup>2-</sup> @**1** (c) and [Fe(CN)<sub>6</sub>]<sup>3-</sup>@**1** (d) in DMF solutions.

**Fig. S12** The linear correlation for the plot of (I<sub>0</sub>/I)-1 vs concentration of Fe<sup>3+</sup> (a); Cr<sub>2</sub>O<sub>7</sub><sup>2-</sup> (b); CrO<sub>4</sub><sup>2-</sup> (c) and [Fe(CN)<sub>6</sub>]<sup>3-</sup> (d) in low concentration range, respectively.

**Fig. S13.** UV-vis adsorption spectra of various K<sub>x</sub>(A) solutions and the excitation spectrum of complex **1**.

**Fig. S14.** UV-vis adsorption spectrum of M(NO<sub>3</sub>)<sub>x</sub> DMF solutions and the excitation spectrum of complex **1** in DMF solution.

**Fig. S15.** PXRD patterns of complex **1** treated by different M(NO<sub>3</sub>)<sub>x</sub> DMF solutions (a) and anion DMF solutions (b).

**Fig. S16.** (a) The fluorescence intensity of complex **1** after five runs sensing experiment with Fe<sup>3+</sup> (a); Cr<sub>2</sub>O<sub>7</sub><sup>2-</sup> (b); CrO<sub>4</sub><sup>2-</sup> (c) and [Fe(CN)<sub>6</sub>]<sup>3-</sup> (d).

**Fig. S17.** XPS spectra of **1** (black) and **1**@Fe<sup>3+</sup> (red).

**Fig. S18.** Color differences of the DMF solutions with complex **1** in various dyes.

**Fig. S19.** PXRD pattern after dye experiment of complex **1**.

**Table S1** Selected bond lengths [Å] and angles [°] for **1**.

| <b>1</b>       |           |                      |            |
|----------------|-----------|----------------------|------------|
| Ba(2)-O(11)#1  | 2.626(5)  | O(11)#1-Ba(2)-O(5)#2 | 109.49(18) |
| Ba(2)-O(5)#2   | 2.686(6)  | O(11)#1-Ba(2)-O(15)  | 101.8(2)   |
| Ba(2)-O(15)    | 2.738(8)  | O(5)#2-Ba(2)-O(15)   | 72.5(2)    |
| Ba(2)-O(9)#3   | 2.756(5)  | O(11)#1-Ba(2)-O(9)#3 | 164.01(16) |
| Ba(2)-O(2)#4   | 2.807(5)  | O(5)#2-Ba(2)-O(9)#3  | 72.89(16)  |
| O(10)-Ba(1)#4  | 2.692(6)  | O(15)-Ba(2)-O(9)#3   | 94.0(2)    |
| O(10)-Ba(3)#4  | 3.038(6)  | O(11)#1-Ba(2)-O(2)#4 | 84.36(17)  |
| O(11)-Ba(2)#11 | 2.626(5)  | O(5)#2-Ba(2)-O(2)#4  | 141.59(19) |
| O(11)-Ba(1)#12 | 2.947(5)  | O(15)-Ba(2)-O(2)#4   | 69.6(2)    |
| Ba(2)-O(1)#4   | 2.848(5)  | O(9)#3-Ba(2)-O(2)#4  | 103.62(17) |
| Ba(2)-O(4)     | 2.868(6)  | O(11)#1-Ba(2)-O(1)#4 | 73.57(16)  |
| Ba(2)-O(3)     | 2.967(6)  | O(5)#2-Ba(2)-O(1)#4  | 171.01(17) |
| Ba(1)-O(10)#6  | 2.692(6)  | O(15)-Ba(2)-O(1)#4   | 115.6(2)   |
| Ba(1)-O(1)#5   | 2.701(5)  | O(5)-Ba(3)-O(6)      | 45.34(17)  |
| Ba(1)-O(13)    | 2.720(7)  | O(14)-Ba(3)-O(6)     | 131.2(2)   |
| Ba(1)-O(8)     | 2.740(5)  | O(16)-Ba(3)-O(8)     | 129.5(3)   |
| Ba(1)-O(14)    | 2.790(7)  | O(7)-Ba(3)-O(8)      | 46.48(16)  |
| Ba(1)-O(11)#8  | 2.947(5)  | O(5)-Ba(3)-O(8)      | 146.52(19) |
| Ba(3)-O(3)#9   | 2.715(6)  | O(14)-Ba(3)-O(8)     | 63.1(2)    |
| Ba(3)-O(16)    | 2.740(10) | O(6)-Ba(3)-O(8)      | 124.86(17) |
| Ba(1)-O(12)#8  | 2.790(6)  | O(16)-Ba(3)-O(10)#6  | 101.9(3)   |
| Ba(3)-O(9)#6   | 2.745(5)  | O(7)-Ba(3)-O(10)#6   | 118.56(16) |
| Ba(3)-O(7)     | 2.761(5)  | O(1)-Ba(1)#7         | 2.701(5)   |
| Ba(3)-O(5)     | 2.818(6)  | O(1)-Ba(2)#6         | 2.848(5)   |
| Ba(3)-O(14)    | 2.838(7)  | O(2)-Ba(2)#6         | 2.807(5)   |
| Ba(3)-O(6)     | 2.839(6)  | O(3)-Ba(3)#2         | 2.714(6)   |
| Ba(3)-O(8)     | 2.850(5)  | O(4)-Ba(1)#5         | 2.704(5)   |
| Ba(3)-O(10)#6  | 3.038(6)  | O(5)-Ba(2)#9         | 2.686(6)   |
| O(9)-Ba(2)#10  | 2.756(5)  | O(9)-Ba(3)#4         | 2.745(5)   |

Symmetry transformations used to generate equivalent atoms of **1**: #1  $x, y, z+1$ ; #2  $-x+1/2, -y+1, z+1/2$ ; #3  $-x+1/2, -y, z+1/2$ ; #4  $x, y-1, z$ ; #5  $-x+1, y-1/2, -z+1/2$ ; #6  $x, y+1, z$ ; #7  $-x+1, y+1/2, -z+1/2$ ; #8  $-x+1, y+1/2, -z-1/2$ ; #9  $-x+1/2, -y+1, z-1/2$ ; #10  $-x+1/2, -y, z-1/2$ ; #11  $x, y, z-1$ ; #12  $-x+1, y-1/2, -z-1/2$ ; #13  $-x+3/2, -y+1, z+1/2$ .

**Table S2** A comparison of the luminescent MOFs and **1** used for detecting various ions.

| MOFs                                                                                                       | Quenching constant ( $K_{sv}$ )/( $M^{-1}$ ) | Medium           | Ref.      |
|------------------------------------------------------------------------------------------------------------|----------------------------------------------|------------------|-----------|
| <b>Fe<sup>3+</sup></b>                                                                                     |                                              |                  |           |
| [Zn(ATA <sup>a</sup> )(L)]·H <sub>2</sub> O                                                                | $0.557 \times 10^3$                          | H <sub>2</sub> O | 1         |
| [Cd(ATA <sup>a</sup> )(L)]·2H <sub>2</sub> O                                                               | $3.838 \times 10^3$                          | H <sub>2</sub> O | 1         |
| [Eu <sub>2</sub> (TDC <sup>b</sup> ) <sub>3</sub> (CH <sub>3</sub> OH) <sub>2</sub> ·(CH <sub>3</sub> OH)] | $3.42 \times 10^3$                           | MeOH             | 2         |
| FJI-C8 <sup>c</sup>                                                                                        | $2.188 \times 10^3$                          | DMF              | 3         |
| Zn-DTA <sup>d</sup>                                                                                        | $8.4 \times 10^3$                            | H <sub>2</sub> O | 4         |
| <b>1</b>                                                                                                   | $11.7773 \times 10^3$                        | DMF              | This work |
| [Zn(BIPA <sup>e</sup> )(tfbdc)] <sub>n</sub>                                                               | $1.32 \times 10^{41}$                        | DMF              | 5         |
| [Cd(BIPA <sup>e</sup> )(tfbdc)(H <sub>2</sub> O)]·DMF                                                      | $1.27 \times 10^4$                           | DMF              | 5         |
| <b>Cr<sub>2</sub>O<sub>7</sub><sup>2-</sup></b>                                                            |                                              |                  |           |
| [Cd(ATA <sup>a</sup> )(L)]·2H <sub>2</sub> O                                                               | $0.97 \times 10^3$                           | H <sub>2</sub> O | 1         |
| [Zn(ATA <sup>a</sup> )(L)]·H <sub>2</sub> O                                                                | $1.485 \times 10^3$                          | H <sub>2</sub> O | 1         |
| <b>1</b>                                                                                                   | $9.15788 \times 10^3$                        | DMF              | This work |
| [Zn(BIPA <sup>e</sup> )(tfbdc <sup>f</sup> )] <sub>n</sub>                                                 | $1.77 \times 10^4$                           | DMF              | 5         |
| [Cd(BIPA <sup>e</sup> )(tfbdc <sup>f</sup> )(H <sub>2</sub> O)]·DMF                                        | $1.98 \times 10^4$                           | DMF              | 5         |
| <b>CrO<sub>4</sub><sup>2-</sup></b>                                                                        |                                              |                  |           |
| [Zn(ATA <sup>a</sup> )(L)]·H <sub>2</sub> O                                                                | $2.623 \times 10^3$                          | H <sub>2</sub> O | 1         |
| [Cd(ATA <sup>a</sup> )(L)]·2H <sub>2</sub> O                                                               | $3.119 \times 10^3$                          | H <sub>2</sub> O | 1         |
| <b>1</b>                                                                                                   | $3.5927 \times 10^3$                         | DMF              | This work |
| [Zn <sub>3</sub> (L <sup>g</sup> )(OH)(H <sub>2</sub> O) <sub>5</sub> ]·NMP·2H <sub>2</sub> O              | $1.3 \times 10^4$                            | H <sub>2</sub> O | 6         |

ATA<sup>a</sup> = 2-aminoterephthalic acid; TDC<sup>b</sup> = 2,5-thiophenedicarboxylic acid; TDPAT<sup>c</sup> = 2,4,6-tris(3,5-dicarboxylphenylamino)-1,3,5-triazine; DTA<sup>d</sup> = 2,5-di(1*H*-imidazol-1-yl)terephthalic acid; BIPA<sup>e</sup> = bis(4-(1*H*-imidazol-1-yl)phenyl)amine; tfbdc<sup>f</sup> = 2,3,5,6-tetrafluorobenzene -1,4-dicarboxylic acid; L<sup>g</sup> = 2,4-di(3,5-dicarboxylphenyl) benzoic acid.

## S1 Materials and Measurements.

All of the reagents and solvents were used directly without further purification, because of they were purchased from commercial sources. The H<sub>3</sub>L ligand was obtained from Beijing Inokai Technology Company. The analysis of C, H and N elements were mainly conducted by the Perkin-Elmer 2400 C elemental analyzer. Fourier transform infrared (FT-IR) analysis was carried on an Equinox-55 FT-IR spectrometer with KBr discs in the range of 4000-400 cm<sup>-1</sup>. Thermogravimetric analyses (TGA) was performed on a NETZSCH STA 449 C microanalyzer analyzer under flowing N<sub>2</sub> with a heating rate of 10 °C min<sup>-1</sup>. Powder X-ray diffraction (PXRD) data was collected using a Bruker D8 ADVANCE X-ray powder diffractometer equipped with Cu-Kα (λ = 1.5418 Å and 2θ at 5-50°). The luminescence performance data was obtained with Hitachi F4500 fluorescence spectrophotometer at ambient temperature. The X-ray photoelectron spectroscopy (XPS) was performed on an AXIS Ultra spectrometer. The UV-Vis spectra was earned on Hitachi U-3310 spectrometer.

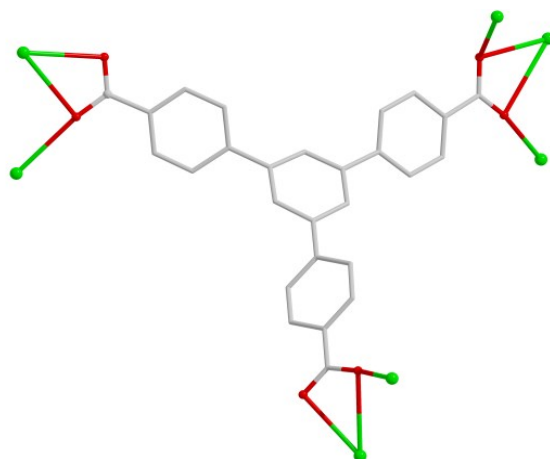

Fig. S1 The coordination modes of  $L^3$  ligands in complex **1**.

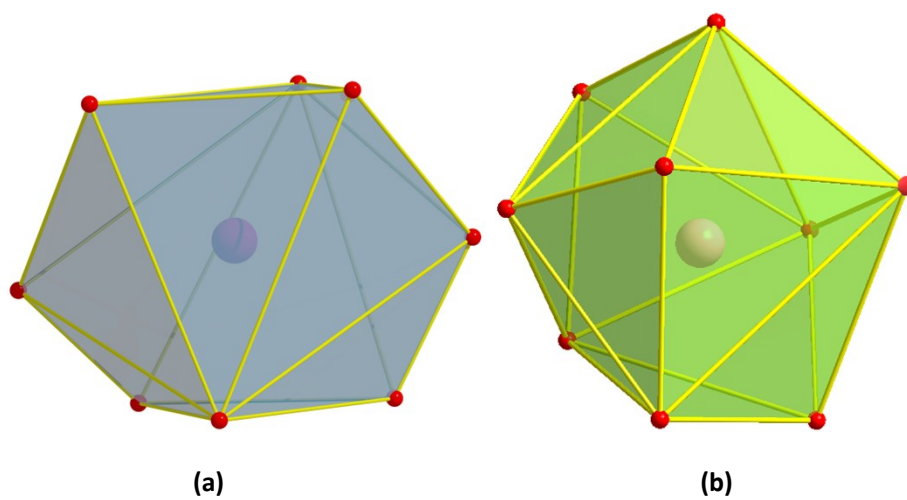

Fig. S2 (a) The distorted dodecahedron of **Ba1** and **Ba2**; (b) A distorted tetrakaidecahedron coordination geometry of **Ba3** of complex **1**.

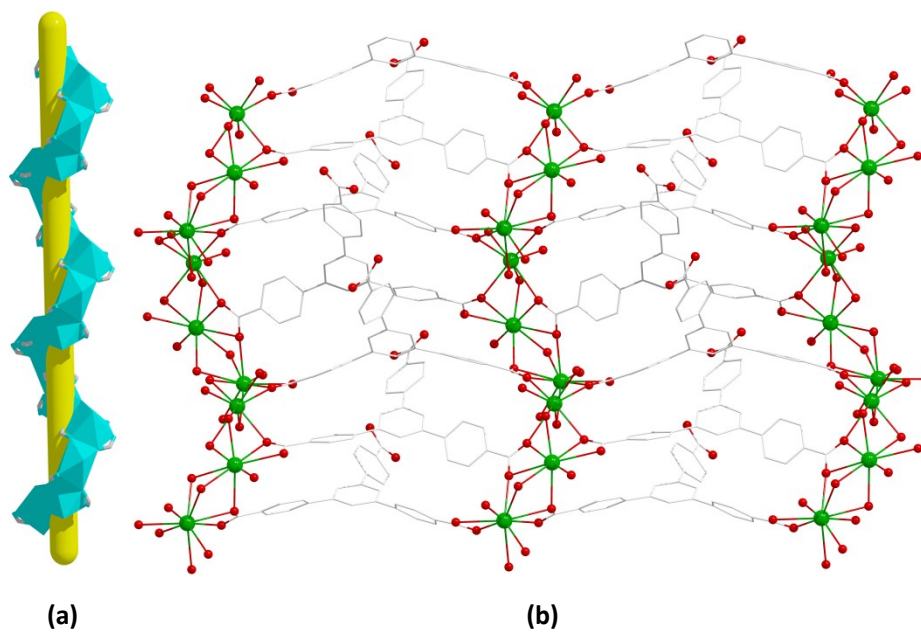

Fig. S3 (a) The helical rod **SBU**s metal chain viewed along the **b** axis; (b) 2D layer structure of complex

**1**, the coordinated NMP are omitted for clarity.

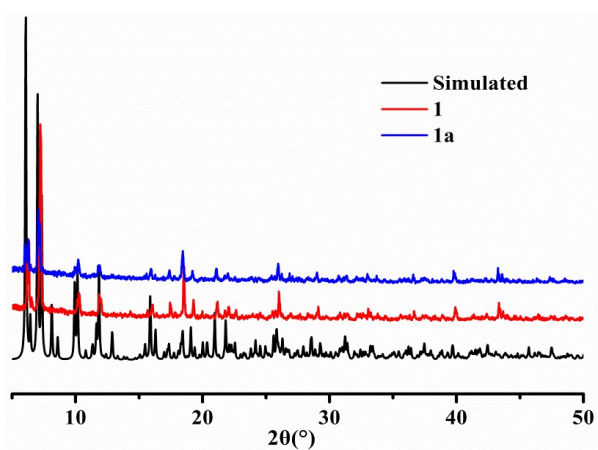

**Fig. S4** PXRD patterns of complex **1** and complex **1a**.

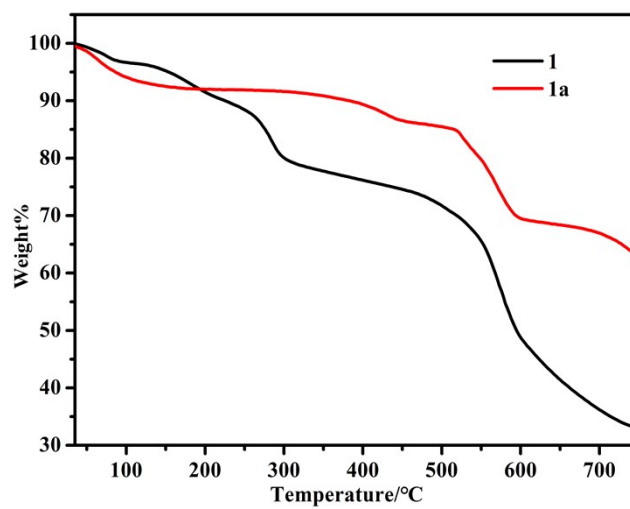

**Fig. S5** The TGA curves of complex **1**.

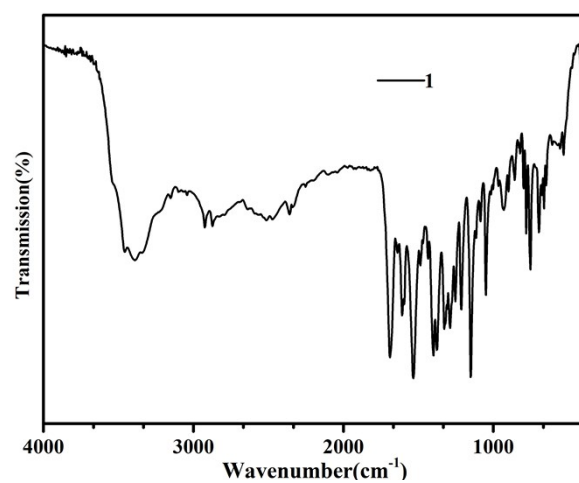

**Fig. S6** The FT-IR spectra of complex **1**.

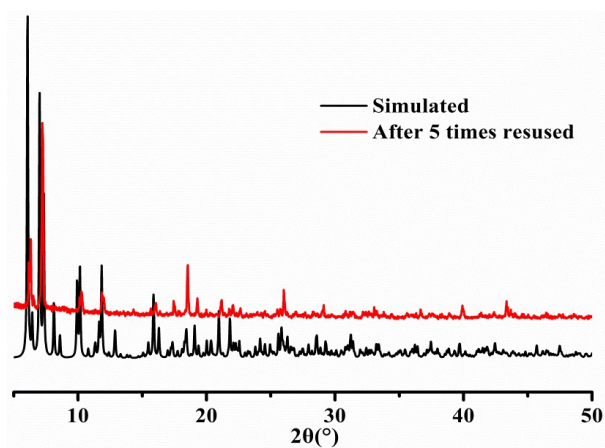

Fig. S7 PXRD pattern after catalytic experiment of complex **1**.

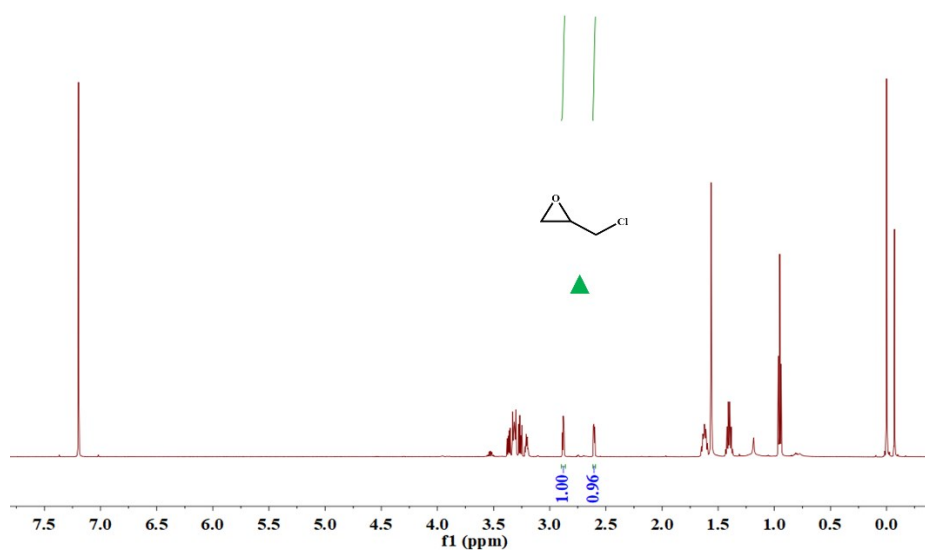

(a)  $^1\text{H}$  NMR spectrum of epoxide with complex **1a** (Table 2, entry 1).

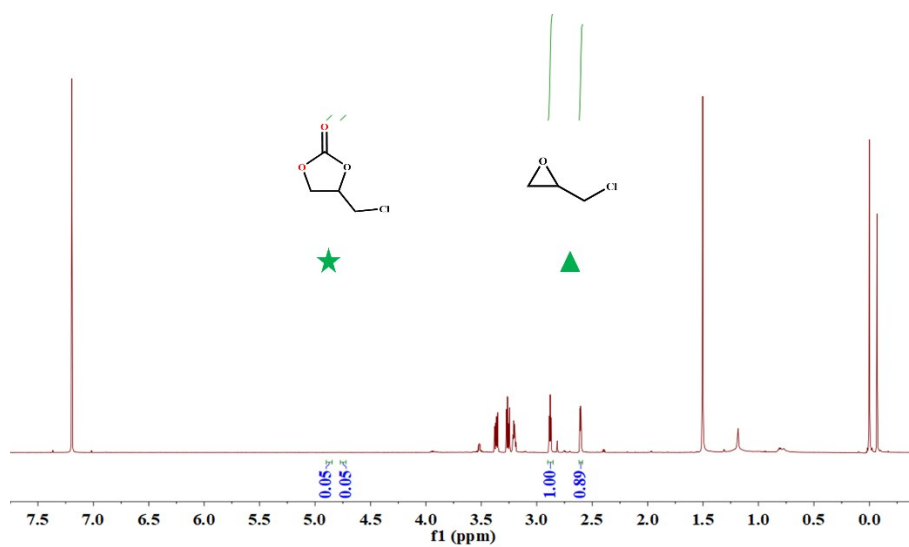

(b)  $^1\text{H}$  NMR spectrum of cyclic carbonate and epoxide with TBAB (Table 2, entry 2).

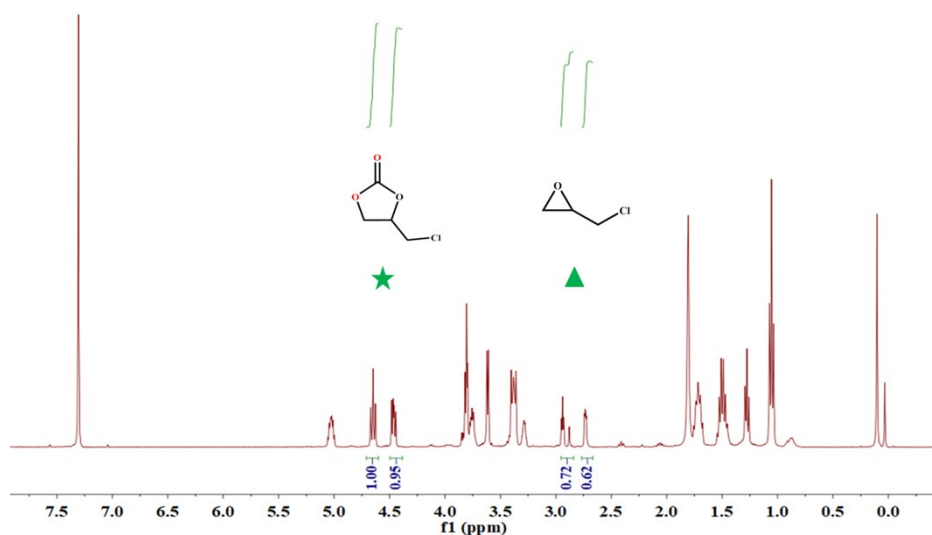

(c)  $^1\text{H}$  NMR spectrum of cyclic carbonate and epoxide with complex **1a** and TBAB (Table 2, entry 3).

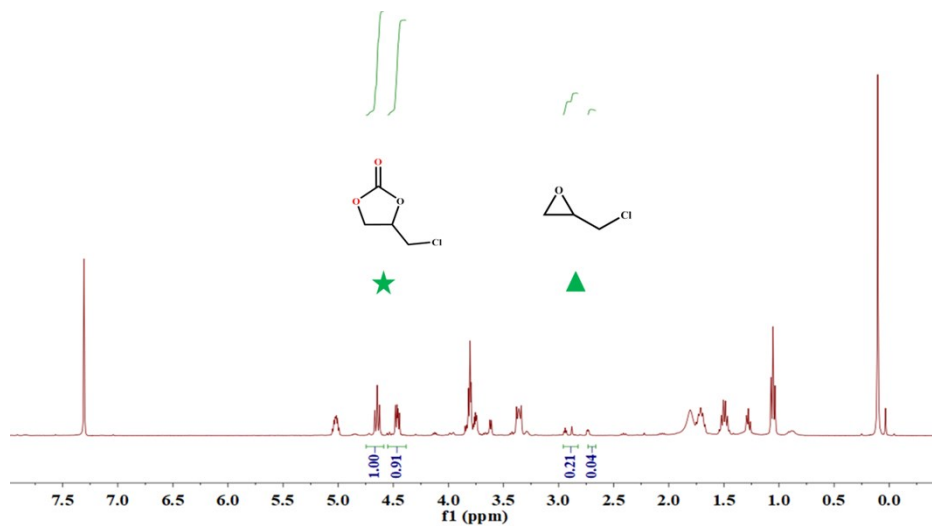

(d)  $^1\text{H}$  NMR spectrum of cyclic carbonate and epoxide with complex **1a** and TBAB (Table 2, entry 4).

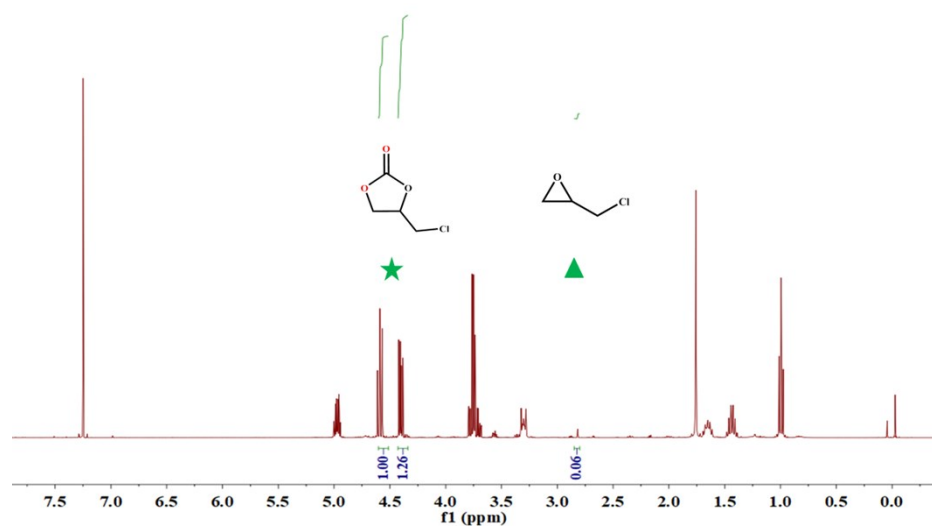

(e)  $^1\text{H}$  NMR spectrum of cyclic carbonate and epoxide with complex **1a** and TBAB (Table 2, entry 5).



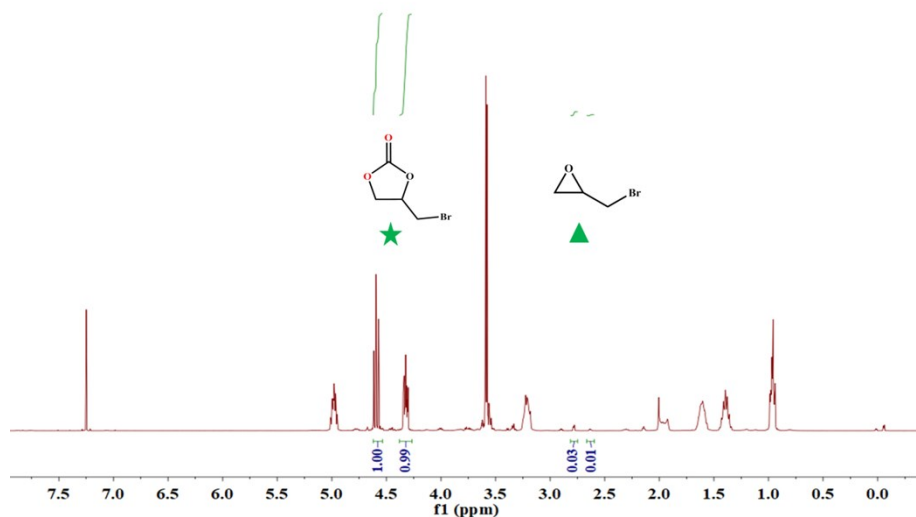

(f)  $^1\text{H}$  NMR spectrum of cyclic carbonate and epoxide with complex **1a** and TBAB (Table 2, entry 6).

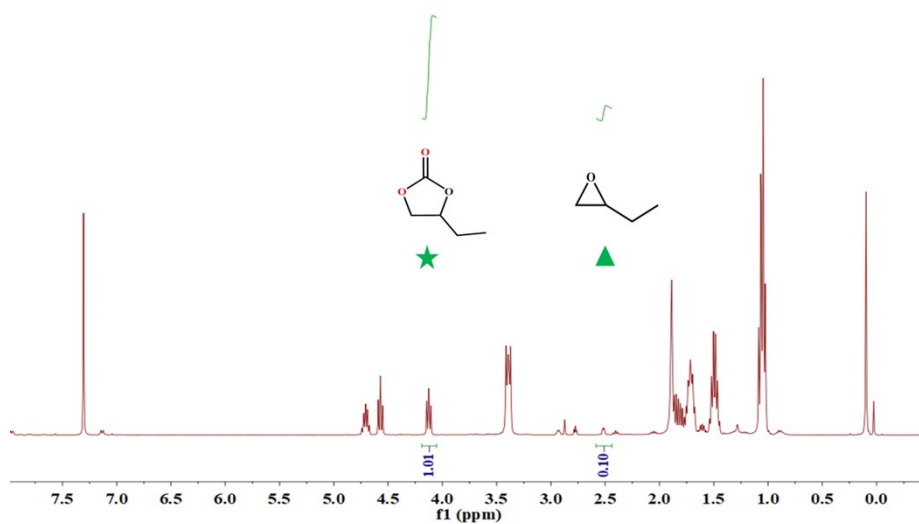

(g)  $^1\text{H}$  NMR spectrum of cyclic carbonate and epoxide with complex **1a** and TBAB (Table 2, entry 7).

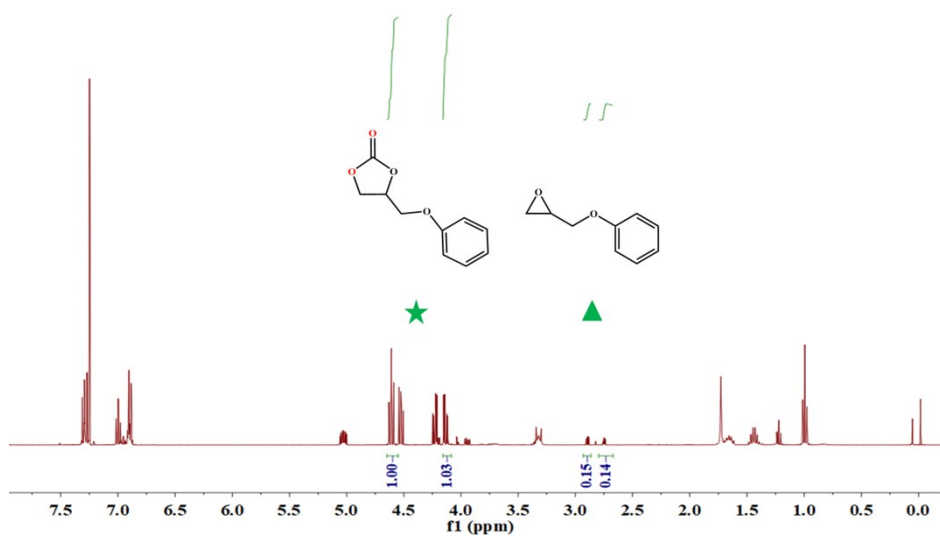

(h)  $^1\text{H}$  NMR spectrum of cyclic carbonate and epoxide with complex **1a** and TBAB (Table 2, entry 8).

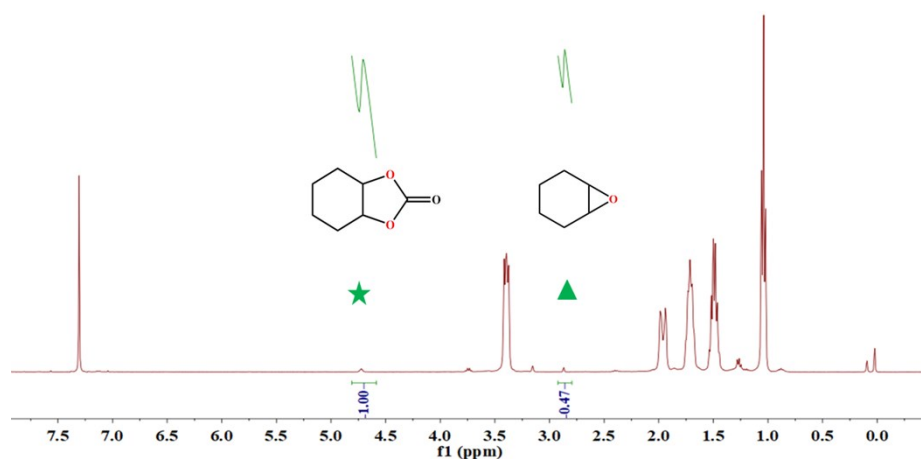

(i)  $^1\text{H}$  NMR spectrum of cyclic carbonate and epoxide with complex **1a** and TBAB (Table 2, entry 9).

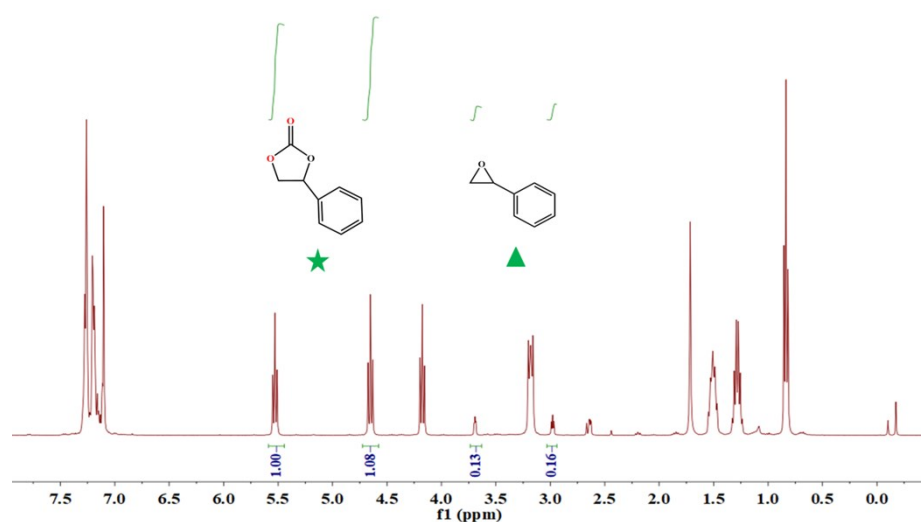

(j)  $^1\text{H}$  NMR spectrum of cyclic carbonate and epoxide with complex **1a** and TBAB (Table 2, entry 10).

**Fig. S8**  $^1\text{H}$  NMR spectrum of cycloaddition of  $\text{CO}_2$  and various epoxide.

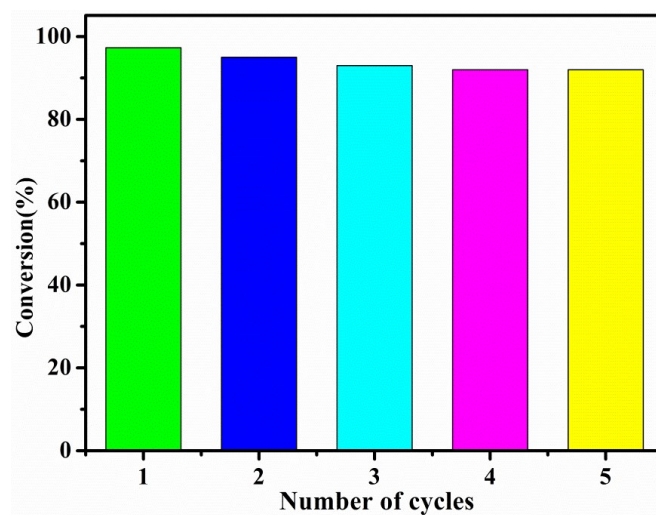

**Fig. S9** Cyclic experiments for the cycloaddition  $\text{CO}_2$  of complex **1**.

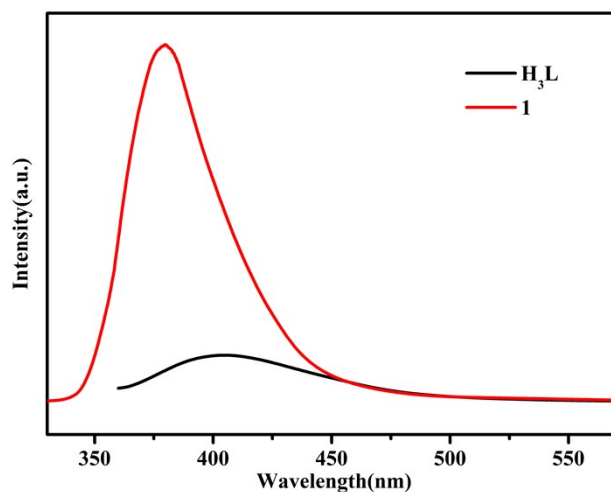

**Fig. S10** The solid state emission spectra of free  $H_3L$  ligand and complex **1**.

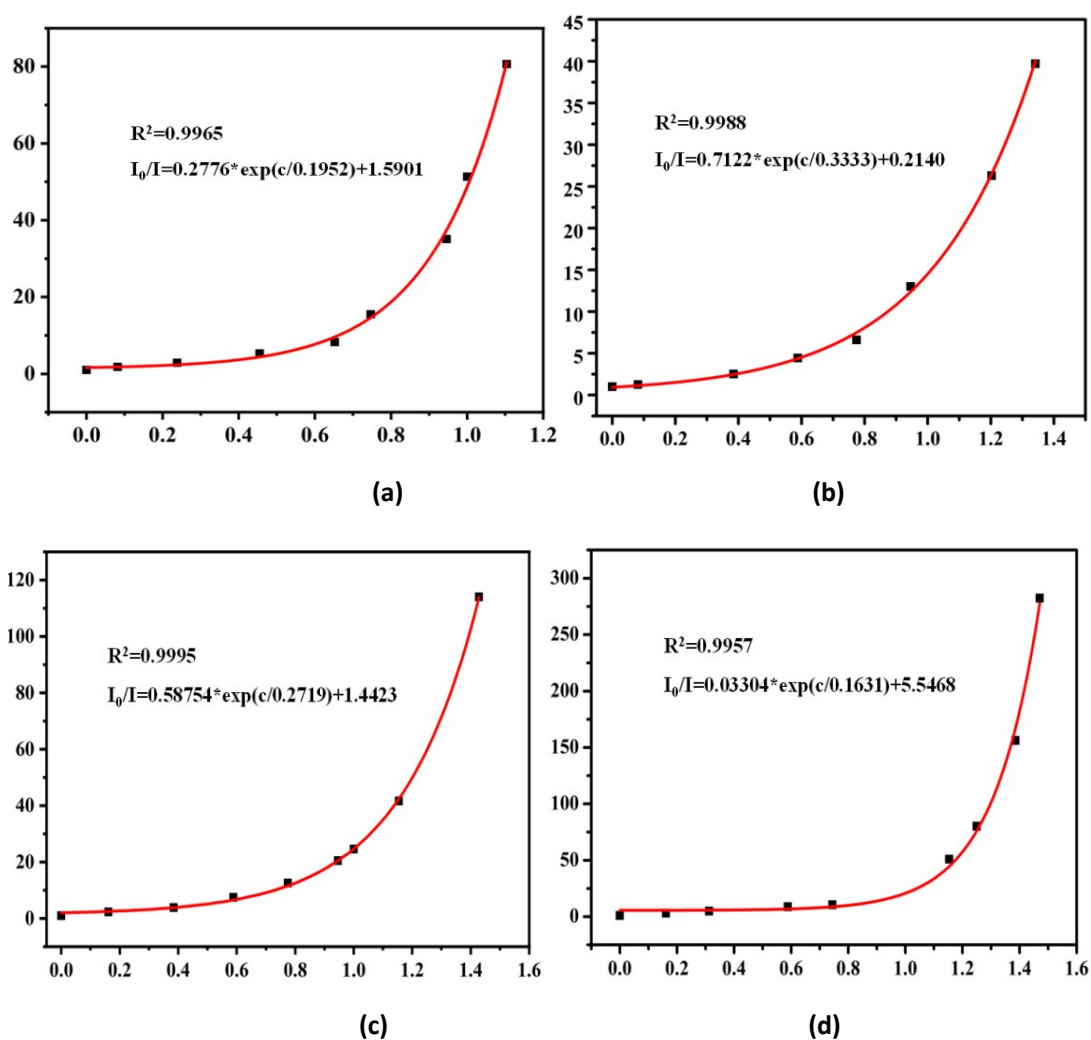

**Fig. S11** The relative luminescence intensities of different concentrations  $Fe^{3+}$  (a);  $Cr_2O_7^{2-}$  (b);  $CrO_4^{2-}$  (c) and  $[Fe(CN)_6]^{3-}$  (d) @**1** in DMF solutions.

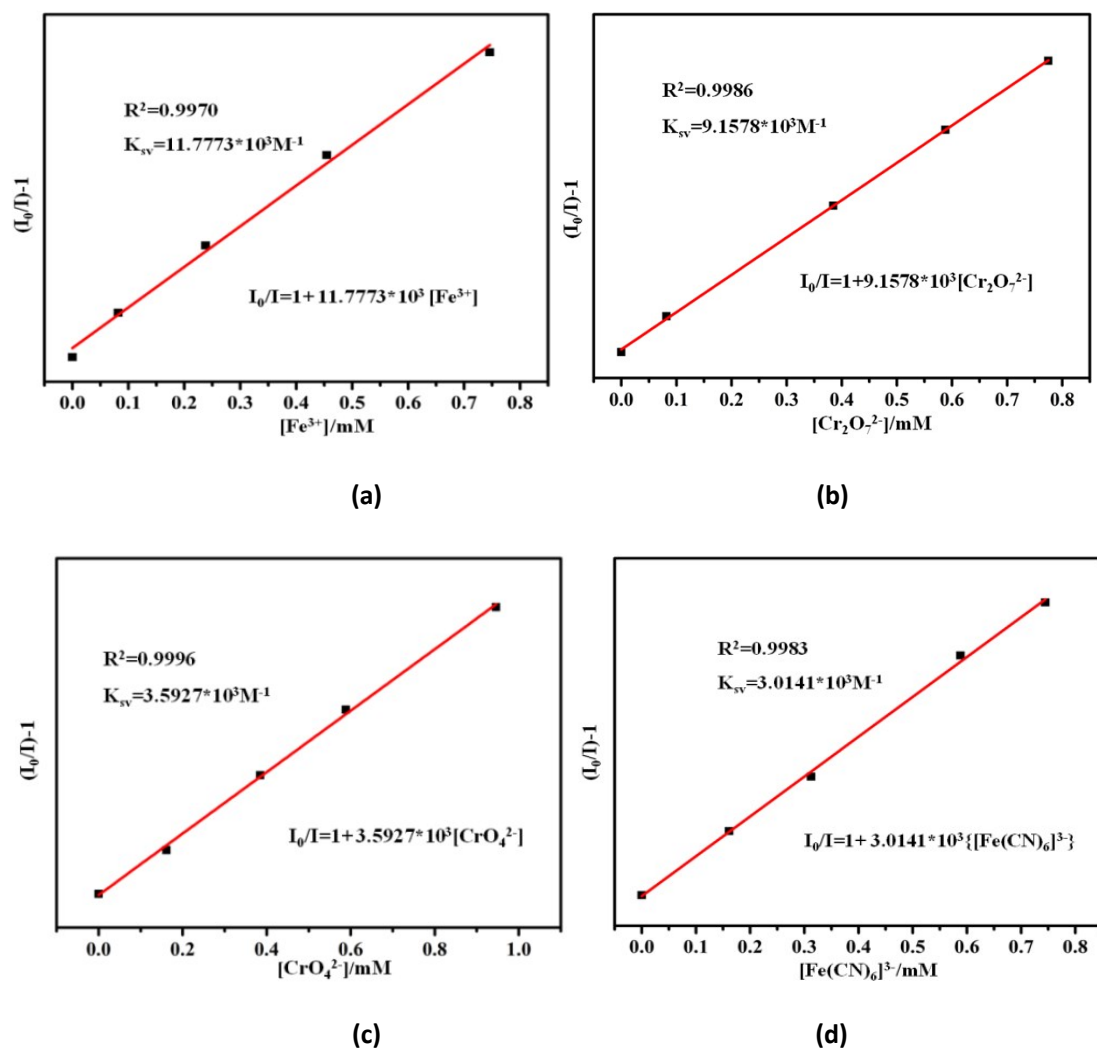

**Fig. S12** The linear correlation for the plot of  $(I_0/I)-1$  vs concentration of  $Fe^{3+}$  (a);  $Cr_2O_7^{2-}$  (b);  $CrO_4^{2-}$  (c) and  $[Fe(CN)_6]^{3-}$  (d) in low concentration range, respectively.

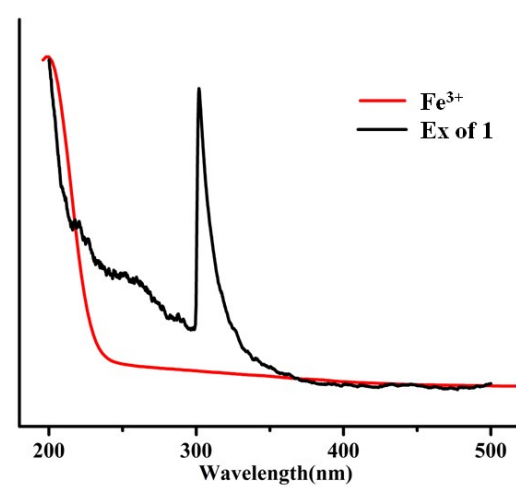

**Fig. S13** UV-vis adsorption spectra of various  $K_x(A)$  solutions and the excitation spectrum of complex 1.

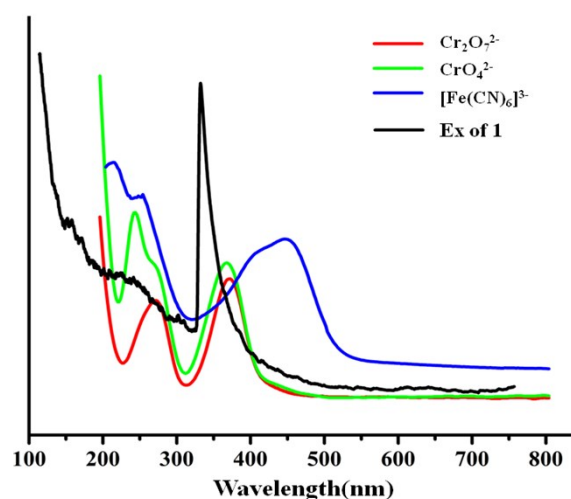

**Fig. S14** UV-vis adsorption spectrum of  $M(\text{NO}_3)_x$  DMF solutions and the excitation spectrum of complex **1** in DMF solution.

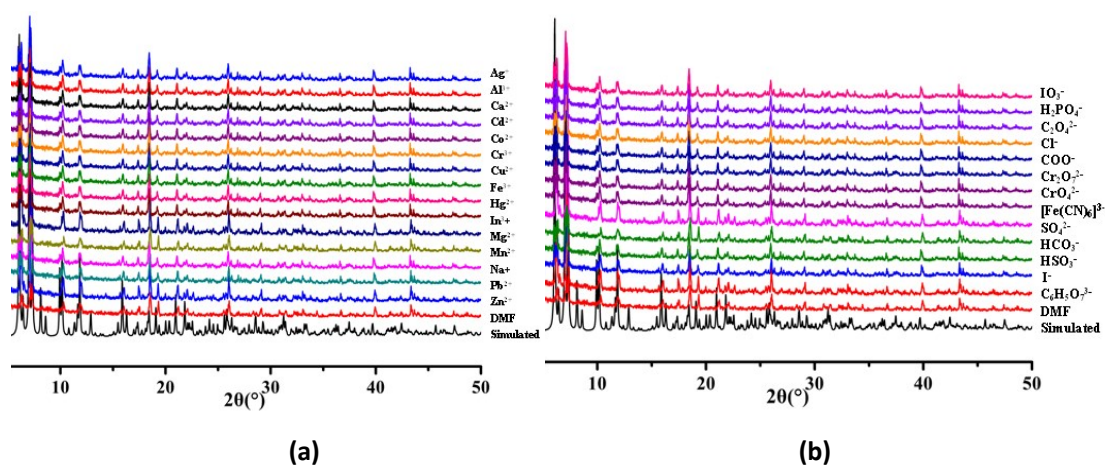

**Fig. S15** PXRD patterns of complex **1** treated by different  $M(\text{NO}_3)_x$  DMF solutions (a) and anion DMF solutions (b).

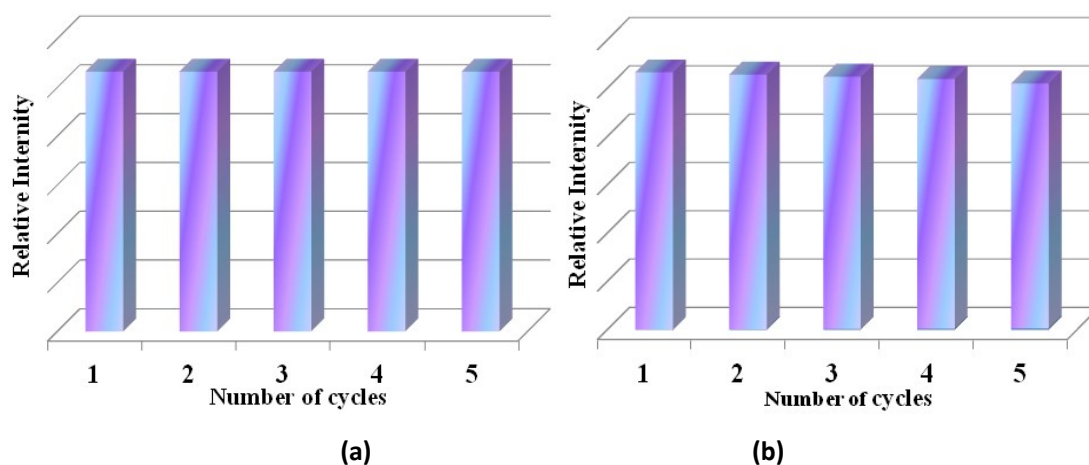

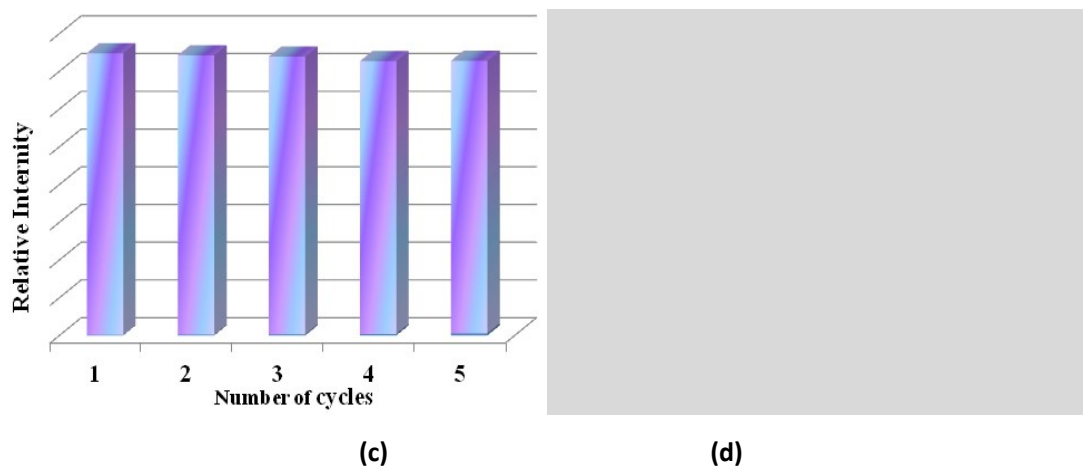

**Fig. S16** (a) The fluorescence intensity of complex **1** after five runs sensing experiment with  $\text{Fe}^{3+}$  (a);  $\text{Cr}_2\text{O}_7^{2-}$  (b);  $\text{CrO}_4^{2-}$  (c) and  $[\text{Fe}(\text{CN})_6]^{3-}$  (d).

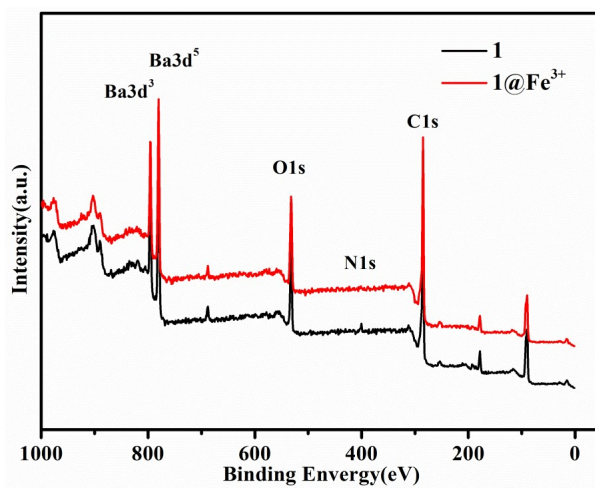

**Fig. S17** XPS spectra of **1** (black) and **1@Fe<sup>3+</sup>** (red).

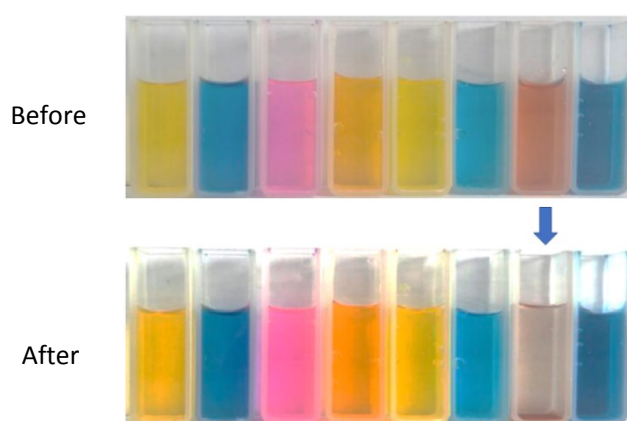

**Fig. S18** Color differences of the DMF solutions with complex **1** in various dyes.

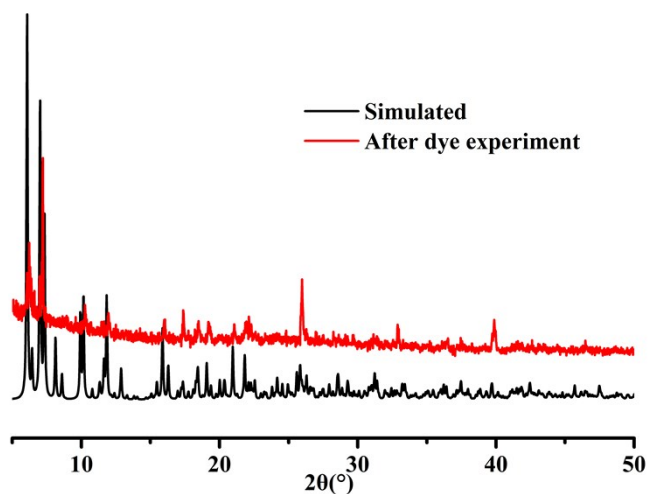

Fig. S19 PXRD pattern after dye experiment of complex 1.

## References

- [1] B. Parmar, Y. Rachuri, K. K. Bisht and E. Suresh, *Inorg. Chem.*, 2017, **56**, 10939-10949.
- [2] K. Xu, F. Wang, S. Huang, Z. Yu, J. Zhang, J. Yu, H. Gao, Y. Fu, X. Li and Y. Zhao, *RSC Adv.*, 2016, **6**, 91741-91747.
- [3] C. H. Chen, X. S. Wang, L. Li, Y. B. Huang and R. Cao, *Dalton Trans.*, 2018, **47**, 3452-3458.
- [4] L. Deng, Y. Zhang, D. Zhang, S. Jiao, J. Xu, K. Liu and L. Wang, *CrystEngComm*, 2019, **21**, 6056-6062.
- [5] Z. J. Wang, F. Y. Ge, G. H. Sun and H. G. Zheng, *Dalton Trans.*, 2018, **47**, 8257-8263.
- [6] Y. T. Yan, J. Liu, G. P. Yang, F. Zhang, Y. K. Fan, W. Y. Zhang, Y. Y. Wang, *CrystEngComm*, 2018, **20** 477-486.
